# Supplementary material
Source: publisher figshare collection journal article supplement (https://wiley.figshare.com/ndownloader/files/10489069)
Supplement: Supplementary file 1 [file 10489069]

## Sheet: BDNF CeA
HAn
Female	36.5	30.25	34	25.5		16.75	23.5	29.4167	23	24	29
Male	21	23	20.5	19.5	23		19		27.67	11.25	20.1533
LAn
Female	19.75	13		17.33	15	16		24	27.75	19.25	21.616
Male	18		18		24.67	21	13.5		18.25	18.9033	8

## Sheet: BDNF VMH
HAn
Female		51.5	37.75	34	28		32	29.25
Male		30	24.25	33.25		35	35		38
LAn
Female	25			34		45		34.25	41
Male	29.5		30.33		37.33	34.33	30.25		27

## Sheet: BDNF mPFC
HAn
Female	53	63	58	61	49.67		54	51.33	51	51
Male	33	29.25	34	21	22	25.67		31.33	43	23
LAn
Female	46.75	47	43	49.67	46		46	47.75	43.5	52
Male	29		31.5		24.67	29	29.67		31.75	29.265

## Sheet: PV mPFC
HAn
Female	32	6	20	9	6	23	3	24	13	14
Male	3	1	0	10	15	13	8	15	6	10
LAn
Female	39	27	24	22	22	13	37	21	27	31
Male	20	20	14	4	6	10	27	20	12	16	21	12

## Sheet: PV CA2
HAn
Female	5	4	3	6	2	6	5	6	7	9	4	2	5	2	3	7	8	6
Male	2	3	4	5	3	6	3	4	3	2	5	4	2	2	3	4	2	4
LAn
Female	4	2	5	5	7	5	4	4	1	3	4	5	4	3	1	1	2	5
Male	5	4	2	5	5	4	5	3	3	2	5	4	3	6	4	4	2	3

## Sheet: PV DG
HAn
Female	3	3	2	2	2	4	4	5	3	2	1	2	9	5	5	3	6	4	2
Male		3	2	2	1	1	3	3	3	2	2	5	2	2	2	2	1	4	5	2
LAn
Female	4	5	3	9	5	5	6	5	3	4	2	1	3	4	3	2	4	3	3
Male	4	3	1	1	2	2	2	4	5	3	4	2	2	1	1	2	6	3	3

## Sheet: %OATime Bline & Drug EPM
Baseline %OA Time
HAn
Female	28.9768	34.1431	16.2501	20.5943	17.7253	17.7383	33.2946	36.1342	17.9942	55.7493	19.7121	30.8505	15.0688	9.81898	19.0176	19.6703	37.2599	9.79053	22.3747	9.8706	32.7337	33.7178	25.9461	28.5843	21.6501	23.6115	38.8184	13.9853
Male	42.909	16.8831	42.6051	15.9742	34.9953	18.7083	27.8421	18.3683	18.7483	17.73	21.0619	10.2111	20.9153	28.2956	24.1163	19.5166	21.7902	19.4356	28.3926	14.7227	20.8387	17.2388	15.9606	25.8638	21.7909	34.1797	13.7663	22.1	17.7788
Baseline %OA Time
LAn	29.2653	32.0888	25.3817	42.4172	19.1634	16.4494	38.8839	33.8865	28.4559	27.9193	42.6502	32.9802	68.6338	30.1189	42.5982	39.0306	31.0372	38.2443	32.0357	23.7391	45.4569	34.706	13.9507	51.696	41.6002	27.7689	31.0366	32.4677	40.2301	44.7491	29.8675	32.0578	25.0129
Female	57.1174	48.4757	35.374	46.1277	12.0618	25.3903	25.5796	21.2746	19.8725	25.4618	7.29307	39.1246	30.1178	31.5029	27.7171	33.8319	36.9556	46.7242	44.7947	30.734	25.1948	43.7183	8.94368	36.8854	24.3846	28.0291
Male
	Vehicle										0.1 mg/kg										1.0 mg/kg
HAn Female	20.1357	36.7312	12.9645	14.57	43.665	61.7603	43.4008	53.1161	61.4765	36.2922	14.518	15.405	21.6706	6.02938	41.8379	41.662	49.8872	15.3711	41.5994	44.3411	11.4421	26.1699	42.7435	39.3308	62.7553	58.6388	43.3951	28.0468	73.3261	74.9047
LAn Female	30.5999	37.9447	38.6465	53.5181	14.5791	64.1067	57.8156	41.8657	62.6717	64.3798	53.7881	47.1773	57.9149	51.4122	55.4625	53.6463	59.7964	46.2767	51.2385	44.9557	52.2307	74.5351	72.3407	73.8839	64.2468	75.6163	53.5707	62.2487	71.3039	65.0912
HAn Male	24.5104	44.5325	23.781	8.30616	49.0229	44.3685	54.5609	10.5326			22.0931	28.8098	8.42218	40.9731	20.9877	45.5503	17.1579	42.3404			48.3817	49.8357	44.3755	52.1206	48.9654	59.6472	33.3846	35.175
LAn Male	31.9517	22.7751	25.3624	54.4177	43.9588	26.7412	9.5154	34.6404			27.1429	18.9694	23.4775	26.3338	62.2994	34.6046	38.5905	38.5064			27.8772	44.5246	45.7612	36.5473	48.0982	42.5158	42.2075	50.837

## Sheet: %OAEntries Bline & Drug EPM
Baseline %OA Entries
HAn
Female	33.3333	37.037	35	35.2941	30	26.6667	35	47.8261	38.0952	50	33.3333	50	20	40	34.7826	46.1538	40	25	31.8182	27.7778	41.1765	35.2941	45.8333	42.8571	41.1765	33.3333	37.037	19.2308
Male	36.8421	25	47.6191	21.0526	38.4615	31.25	33.3333	23.5294	33.3333	31.25	46.1538	28.5714	24	37.5	41.1765	23.0769	33.3333	35.7143	37.5	33.3333	21.4286	35	25	28.5714	27.2727	28.5714	20	33.3333	28.5714
Baseline %OA Entries
LAn
Female	40.9091	32	28.5714	39.2857	33.3333	33.3333	41.1765	40	47.8261	35.2941	45	36.3636	47.6191	30.7692	37.931	52.9412	39.1304	35.2941	55.5556	25	54.5455	50	11.1111	52.3809	52.6316	43.4783	52.3809	35.7143	43.75	57.1429	36.8421	40	27.7778
Male	56.25	54.2857	42.8571	43.75	37.5	36.8421	50	44.4444	42.1053	33.3333	10	38.4615	23.5294	45.4545	45.4545	41.6667	44.4444	47.0588	47.0588	53.3333	56.25	60	22.2222	37.5	50	37.5
HAn Female	Vehicle										0.1 mg/kg										1.0 mg/kg
LAn Female	20.14	36.73	12.96	14.57	43.66	61.76	43.4	53.12	61.48	36.29	14.52	15.41	21.67	6.03	41.84	41.66	49.89	15.37	41.6	44.34	11.44	26.17	42.74	39.33	62.76	58.64	43.4	28.05	73.33	74.9
HAn Male	30.6	37.94	38.65	53.52	14.58	64.11	57.82	41.87	62.67	64.38	53.79	47.18	57.91	51.41	55.46	53.65	59.8	46.28	51.24	44.96	52.23	74.54	72.34	73.88	64.25	75.62	53.57	62.25	71.3	65.09
LAn Male	24.51	44.53	23.78	8.31	3.22	49.02	44.37	65.74	54.56	10.53	22.09	28.81	8.42	40.97	20.99	7.83	45.55	46.63	17.16	42.34	8.5	18.38	25.84	44.38	22.12	24.97	59.65	33.38	35.17	59.77
	9.52	34.64	6.3	31.95	3.09	22.78	25.36	54.42	43.96	26.74	11.13	27.14	18.97	23.48	13.21	26.33	62.3	34.6	38.59	38.51	19.33	27.88	44.52	45.76	36.55	48.1	42.52	42.21	50.84	63.2
